Running Head: BASOLATERAL AMYGDALA CONNECTIVITY

1

2

3

4 Adults vs. neonates: Differentiation of functional connectivity between the basolateral amygdala  
5 and occipitotemporal cortex

6

7

8 Heather A. Hansen<sup>1\*</sup>, Jin Li<sup>1</sup>, and Zeynep M. Saygin<sup>\*</sup>

9

10

11 <sup>1</sup>Department of Psychology, The Ohio State University, Columbus, Ohio, United States of  
12 America

13

14

15 \* Corresponding authors

16 E-mails: hansen.508@osu.edu (HAH), saygin.3@osu.edu (ZMS)

## BASOLATERAL AMYGDALA CONNECTIVITY

### 17 **Abstract**

18           The amygdala, a subcortical structure known for social and emotional processing,  
19 consists of multiple subnuclei with unique functions and connectivity patterns. Tracer studies in  
20 adult macaques have shown that the basolateral subnuclei differentially connect to parts of visual  
21 cortex, with stronger connections to anterior regions and weaker connections to posterior  
22 regions; infant macaques show robust connectivity even with posterior visual regions. Do these  
23 developmental differences also exist in the human amygdala, and are there specific functional  
24 regions that undergo the most pronounced developmental changes in their connections with the  
25 amygdala? To address these questions, we explored the functional connectivity (from resting-  
26 state fMRI data) of the basolateral amygdala to occipitotemporal cortex in human neonates  
27 scanned within one week of life and compared the connectivity patterns to those observed in  
28 young adults. Specifically, we calculated amygdala connectivity to anterior-posterior gradients of  
29 the anatomically-defined occipitotemporal cortex, and also to putative occipitotemporal  
30 functional parcels, including primary and high-level visual and auditory cortices (V1, A1, face,  
31 scene, object, body, high-level auditory regions). Results showed a decreasing gradient of  
32 functional connectivity to the occipitotemporal cortex in adults – similar to the gradient seen in  
33 macaque tracer studies – but no such gradient was observed in neonates. Further, adults had  
34 stronger connections to high-level functional regions associated with face, body, and object  
35 processing, and weaker connections to primary sensory regions (i.e., A1, V1), whereas neonates  
36 showed the same amount of connectivity to primary and high-level sensory regions. Overall,  
37 these results show that functional connectivity between the amygdala and occipitotemporal  
38 cortex is not yet differentiated in neonates, suggesting a role of maturation and experience in  
39 shaping these connections later in life.

40

## BASOLATERAL AMYGDALA CONNECTIVITY

### 41 **Introduction**

42           How does emotional valence influence visual perception? Whether it be driving by an  
43 emotionally salient car crash or happening upon an animal carcass in the jungle, perceiving  
44 visual stimuli through an emotional lens can be critical for quick motor responses and ultimate  
45 survival. Emotionally salient cues preceding a target can enhance target perception (e.g., (1)),  
46 and perceiving aversive stimuli enhances blood flow to cortical regions (e.g., the middle  
47 temporal gyrus (2)). Developmentally, not only does visual acuity improve with age (3), but  
48 visual perceptual mechanisms of emotional stimuli are also fine-tuned with experience (e.g., (4)).

49           Emotional valence is canonically tied to the amygdala, an evolutionarily preserved neural  
50 structure known for emotional processing and regulation (e.g., (5,6)). The amygdala has been  
51 additionally implicated in social cognition and attention (e.g., (7)), fear recognition and  
52 conditioning (e.g., (8,9)), stimulus-value learning and reward (e.g., (10,11)), and novelty  
53 detection (e.g., (12,13)). The functions of the amygdala and the way in which the amygdala  
54 assigns valence to stimuli change across development (14). Similarly, visual perceptual skills and  
55 their neural correlates also change across development (15). Perceiving the identity of visual  
56 stimuli is commonly attributed to the occipitotemporal cortex, the location of the ventral visual  
57 stream and “what” pathway (e.g., (16)). It is posited that emotionally enhanced visual perception  
58 may occur via cortical feedback connections between the amygdala and visual cortex (17).

59           Work in macaques shows that projections from the amygdala subnuclei to the ventral  
60 visual stream are topographically organized on a gradient, such that visual cortical areas that are  
61 more rostral receive heavier amygdalar projections than visual cortical areas that are more caudal  
62 (18,19). Amaral and colleagues (19–22) found the basal subnucleus of the amygdala to  
63 especially follow this pattern, but noted additional projections from area TE to the lateral

## BASOLATERAL AMYGDALA CONNECTIVITY

64 subnucleus that creates a feedforward/feedback loop. Other work in adult macaques has similarly  
65 shown projections from areas TEO and TE to the lateral nucleus of the amygdala, and from area  
66 TE to the basal nucleus (23).

67 Interestingly, these connections change over development. Experiments comparing adult  
68 to juvenile animals, specifically in nonhuman primates (e.g., (23–26)) and rats (e.g., (27,28)),  
69 reveal that amygdalar projections are adult-like in juveniles, but that juveniles also have  
70 additional connections that are either totally eliminated with maturation or become more refined  
71 in their distribution.

72 Do these connections show a similar pattern in human development? We know that  
73 macaque cortex is oriented differently than human cortex, and although homologies exist, the  
74 connectivity pattern in macaques may not necessarily perfectly map to humans (29,30).  
75 Moreover, in humans, it is more challenging to study amygdalar connections at such a fine-  
76 grained level that tracer studies can provide, especially with respect to the basal vs. lateral  
77 nucleus and their connections to visual cortex. Several groups have used a variety of methods to  
78 parcellate the amygdala into two to four subunits (e.g., (31–37)). More recent work has made it  
79 possible to use local intensity differences in a typical T1 scan to divide the human amygdala into  
80 nine separate subunits (38), thus allowing a way to parcellate the amygdala using a standard  
81 resolution anatomical (T1) image and explore the connectivity of these subunits with a separate  
82 (independent) connectivity scan.

83 There is some previous work in humans that explores the developmental changes of  
84 amygdalar connectivity. A study that explored a cross-sectional sample of 5-30 year olds showed  
85 that DWI connectivity of the lateral and basal nuclei to cortical areas becomes increasingly  
86 sparse and localized with age (39). A functional connectivity study in 7-9 year olds vs. adults

## BASOLATERAL AMYGDALA CONNECTIVITY

87 found that the basolateral amygdala had stronger connectivity with temporal regions than the  
88 centromedial amygdala, and that overall connectivity was stronger in adults compared to  
89 children (34). Another study showed that basolateral functional connectivity to regions including  
90 parahippocampal gyrus, superior temporal cortex, and occipital lobe decreases with age across 4-  
91 23-year-olds (36), but that the basolateral amygdala showed increasing functional connectivity to  
92 occipital cortex between ages 3 months to 5 years (37). This last study is the opposite pattern  
93 than what was found in macaque development (i.e., decreasing connectivity to occipital cortex  
94 across age, e.g., (23)), and may be due to the differences between functional vs. white-matter  
95 connectivity or due to differences between macaques and humans. Moreover, it remains unclear  
96 why these connections change with development; the occipitotemporal cortex contains a  
97 multitude of well-studied visual and auditory functional areas. It is possible that amygdala  
98 connectivity changes with respect to functionally specific parts of occipitotemporal cortex that  
99 show increasing developmental specialization. To date, no study has investigated neonatal  
100 functional connectivity of the amygdala subnuclei and no study has investigated this connectivity  
101 with respect to putative functionally-distinct regions within visual and auditory cortex.

102 Does the rostrocaudal gradient of connectivity from the basolateral subnucleus observed  
103 in macaques match that of humans, or will a different pattern emerge? Does this connectivity  
104 pattern exist from birth, or develop later in life? And are the developmental changes in  
105 connectivity specific to certain functional parcels located within the occipitotemporal cortex?  
106 Here we investigate the developmental changes in functional connectivity between the  
107 basolateral amygdala and the occipitotemporal cortex using a cross-sectional sample of adults  
108 and neonates. In the first set of analyses we target the entire occipitotemporal cortex to recreate  
109 the connectivity work done in macaques. Then, we apply a unique approach by targeting

## BASOLATERAL AMYGDALA CONNECTIVITY

110 functionally defined regions in the ventral visual stream in order to draw conclusions about what  
111 might be driving the observed pattern of connectivity.

## 112 **Method**

### 113 **Participants**

#### 114 **Neonates**

115 Forty neonates (15 female, mean gestational age at birth = 38.99 weeks, gestational age  
116 range at scan = 37-44 weeks) were obtained from the initial release of the Developing Human  
117 Connectome Project (dHCP, <http://www.developingconnectome.org>) (40). Neonates were  
118 scanned at the Evelina Neonatal Imaging Center in London, and the study was approved by the  
119 UK Health Research Authority.

#### 120 **Adults**

121 Forty adults (15 female, age range 22-36 years) were obtained from the Human  
122 Connectome Project (HCP), WU-Minn HCP 1200 Subjects Data Release  
123 (<https://www.humanconnectome.org/study/hcp-young-adult>) (41). All participants were scanned  
124 at Washington University in St. Louis, MO. The forty adults used in this study were chosen to  
125 best motion- and sex-match the neonate sample: for each neonate, an adult from the HCP dataset  
126 with the same sex and most similar motion parameter (i.e., framewise displacement, FD) was  
127 determined using k-nearest neighbors. By using this approach, head motion in the final samples  
128 was not significantly different between groups ( $t(78) = 0.77, p = 0.45$ ).

### 129 **Acquisition and Preprocessing**

#### 130 **Neonates**

## BASOLATERAL AMYGDALA CONNECTIVITY

131 Images were acquired on a Philips 3T Achieva scanner using a specially designed  
132 neonatal 32 channel phased array head coil with dedicated slim immobilization pieces to reduce  
133 gross motion (42). All neonates (i.e., both MRI and fMRI scans) were scanned while in natural  
134 sleep. High-resolution (0.8 mm<sup>3</sup>) structural scans were acquired on all participants. T2-weighted  
135 and inversion recovery T1-weighted multi-slice fast spin-echo images were acquired with in-  
136 plane resolution 0.8 x 0.8 mm<sup>2</sup> and 1.6 mm slices overlapped by 0.8 mm (T2-weighted: TE/TR =  
137 156/12000ms; T1 weighted: TE/TR/TI = 8.7/4795/1740ms). Structural MRI data were  
138 preprocessed in FreeSurfer v.6.0.0 (<http://surfer.nmr.mgh.harvard.edu/fswiki/infantFS>) using a  
139 dedicated infant processing pipeline (40,43,44) which includes motion and intensity correction,  
140 surface coregistration, spatial smoothing, subcortical segmentation, and cortical parcellation  
141 based on spherical template registration; FreeSurfer was used for amygdala segmentation (38).  
142 Gray and white matter masks were obtained from segmentations of the T2w volume using the  
143 DRAW-EM algorithm provided by dHCP (45). The resulting cortical and subcortical  
144 segmentations were reviewed for quality control.

145 Resting-state fMRI data were also acquired on all participants, using multiband (MB) 9x  
146 accelerated echo-planar imaging (TE/TR = 38/392ms, voxel size = 2.15 mm<sup>3</sup>) developed for  
147 neonates (see (46) for details). The resting-state scan lasted approximately 15 min and consisted  
148 of 2300 volumes for each run. No in-plane acceleration or partial Fourier was used. Single-band  
149 reference scans were also acquired with bandwidth-matched readout, as well as additional spin-  
150 echo acquisitions with both AP/PA fold-over encoding directions. The data released by the  
151 dHCP included minimal preprocessing of the resting-state fMRI data (see (46)) which included  
152 distortion-correction, motion-correction, 2-stage registration of the MB-EPI functional image to  
153 the T2 structural image, generation of a combined transform from MB-EPI to the 40-week T2

## BASOLATERAL AMYGDALA CONNECTIVITY

154 template, temporal high-pass filtering (150 s high-pass cutoff), and independent component  
155 analysis (ICA) denoising using FSL FIX. Additional preprocessing included smoothing within  
156 gray matter (Gaussian filter with FWHM = 3 mm), and a band-pass filter at 0.009-0.08 Hz. To  
157 further denoise, aCompCor (47) was used to regress out signals from white matter and  
158 cerebrospinal fluid (CSF) which controls physiological noise (e.g., respiration, heartbeat) and  
159 non-neural contributions to the resting state signal. All functional connectivity analyses for the  
160 neonatal group were performed in native functional space.

### 161 **Adults**

162 Images were acquired on a customized 3T Connectome Scanner adapted from a Siemens  
163 Skyra (Siemens AG, Erlanger, Germany). The 32-channel scanner had a receiver head coil and a  
164 body transmission coil specifically designed by Siemens for the WU-Minn and MGH-UCLA  
165 Connectome scanners.

166 High-resolution T2-weighted and T1-weighted structural scans were acquired on all  
167 participants. Images were acquired with 0.7 mm<sup>3</sup> isotropic voxel resolution (T2-weighted 3D T2-  
168 SPACE scan: TE/TR = 565/3200ms; T1-weighted 3D MPRAGE: TE/TR/TI =  
169 2.14/2400/1000ms). The data that were released had undergone preprocessing using the HCP  
170 minimal preprocessing pipelines (see (48) for details), which included: gradient distortion  
171 correction, ACPC registration to produce an undistorted “native” structural volume space, brain  
172 extraction, bias field correction, and registration from the T2-weighted scan to the T1-weighted  
173 scan. Each adult brain was aligned to a common MNI152 template with 0.7 mm isotropic  
174 resolution. Then, a FreeSurfer pipeline (based on FreeSurfer 5.3.0-HCP) specifically designed  
175 for HCP data was used to segment the volume into predefined structures, reconstruct white and



## BASOLATERAL AMYGDALA CONNECTIVITY

176 pial cortical surfaces, and perform folding-based surface registration to their surface atlas  
177 (fsaverage).

178 Resting-state fMRI data were also acquired on all participants, using the gradient-echo  
179 EPI sequence (TE/TR = 33.1/720ms, flip angle = 52°, number of slices = 72, voxel size = 2 × 2 ×  
180 2 mm<sup>3</sup>). The resting-state scan lasted approximately 15 min and consisted of 1200 volumes for  
181 each run. All participants completed two resting-state fMRI sessions, each consisting of one run  
182 with two phases encoding in a right-to-left (RL) direction and one run with phase encoding in a  
183 left-to-right (LR) direction; the current analysis uses the LR phase encoding from the first  
184 session. Participants were instructed to open their eyes with relaxed fixation on a projected bright  
185 cross-hair on a dark background. The data that were released had undergone minimal  
186 preprocessing (48), which included removal of spatial distortions, motion correction, registration  
187 of the fMRI data to both the structural and MNI-152 template, bias field reduction, and denoising  
188 using the novel ICA-FIX method. In order to preprocess these data in a pipeline that mirrored the  
189 neonatal group, we unwarped the data from MNI-152 to native space, then applied spatial  
190 smoothing (Gaussian filter with FWHM = 3 mm) within all gray matter, band-pass filtered at  
191 0.009-0.08 Hz, and implemented aCompCor (47).

## 192 **Defining regions of interest**

### 193 **Amygdala subnuclei**

194 Using automated segmentation (38), nine amygdala subnuclei (lateral, basal, accessory basal,  
195 central, medial, cortical, paralaminar, cortico-amygdaloid transition area, anterior amygdala area)  
196 were parcellated in each individual's native anatomical space and then transferred to functional  
197 space. Because the lateral and basal subnuclei are associated with sensory and cognitive  
198 processes (49,50) and thus likely contribute to emotional visual perception, the combined

## BASOLATERAL AMYGDALA CONNECTIVITY

199 basolateral subnucleus was the main seed of interest in the present experiment. Fig S1 compares  
200 the basolateral amygdala segmentation in neonates with the dHCP-provided amygdala labels; we  
201 found that almost all of the basolateral amygdala used here was within the dHCP manually-  
202 labeled amygdala (proportion of BaLa within dHCP amygdala:  $0.76 \pm 0.11$ ).

### 203 **Occipitotemporal cortex**

204 *Anatomical divisions.* To explore the connectivity of the basolateral amygdala to  
205 occipitotemporal cortex (OTC), an OTC label was made for each individual using anatomical  
206 labeling provided by each data set (i.e., DRAW-EM labels for neonates, aparc+aseg labels for  
207 adults; see Supplement for labels used and Fig S2 for a depiction of labels in a neonate vs. adult)  
208 that combined all anatomical regions in the occipital and temporal cortices. The OTC label was  
209 transferred from native anatomical space to functional space for each subject. In order to track  
210 differences in connectivity across the region, the label was split (separately for each individual  
211 and each hemisphere) into five equal sections from anterior to posterior. These five anatomical  
212 OTC sections were the connectivity targets for the first analyses (see Fig 1A).

213 *Functional parcels.* To explore the functional significance of connectivity patterns,  
214 functional parcels that encompass primary and secondary visual and auditory areas within the  
215 OTC were identified. All parcels that we used are available online and/or by contacting the  
216 corresponding author of the cited publications. The parcels were originally created via the group-  
217 constrained subject-specific method (GSS) (51), which generates probabilistic maps of  
218 functional activation across independent groups of participants and creates parcels that  
219 encapsulate most individuals' functional regions. We used the face-selective fusiform face area  
220 (FFA), occipital face area (OFA), and superior temporal sulcus (STS); object-selective lateral  
221 occipital cortex (LO) and posterior fusiform sulcus (PFS); scene-selective parahippocampal

## BASOLATERAL AMYGDALA CONNECTIVITY

222 place area (PPA) and retrosplenial cortex (RSC) from (52); and high-level auditory region  
223 superior temporal gyrus (STG), a region in vicinity of primary auditory cortex involved in  
224 speech perception (53). In addition, primary visual cortex (V1) and auditory cortex (A1) were  
225 anatomically defined in each subject using the calcarine sulcus and Heschl's gyrus from  
226 FreeSurfer Desikan parcellation (54), respectively. See Fig 2A for an illustration of the parcels.

227 Functional parcels were mapped to the FreeSurfer CVS average-35 in MNI152 brain (if  
228 not already publicly provided in that space) and were subsequently overlaid onto each  
229 individual's anatomical brain using Advanced Normalization Tools (ANTs version 2.1.0;  
230 <http://stnava.github.io/ANTs>) (55). The parcels were then converted to native functional space  
231 using nearest neighbor interpolation with FreeSurfer's `mri_vol2vol` function  
232 ([https://surfer.nmr.mgh.harvard.edu/fswiki/mri\\_vol2vol](https://surfer.nmr.mgh.harvard.edu/fswiki/mri_vol2vol)). For any parcels that overlapped,  
233 intersecting voxels were assigned to the functional parcel with smaller size; this ensured that no  
234 voxel belonged to more than one functional parcel, and additionally compensated for size  
235 differences. Finally, voxels within white matter and cerebellum were removed.

## 236 **Functional connectivity analyses**

237 The mean time course of the basolateral amygdala, each OTC section, and each  
238 functional parcel was computed from the preprocessed resting state images. Functional  
239 connectivity (FC) was calculated using Pearson's correlations between the time courses of the  
240 basolateral seed and each target region, collapsed across hemispheres. To generate normally  
241 distributed values, each FC value was Fisher z-transformed.

242 Connectivity differences were calculated using 2-way mixed ANOVAs, with sample  
243 (adults vs. neonates) as the between-subject variable and target (i.e., different  
244 anatomical/functional regions of interest) as the within-subject variable. Paired *t*-tests were

## BASOLATERAL AMYGDALA CONNECTIVITY

245 conducted for within-group comparisons and independent *t*-tests for between-group comparisons.  
246 The Holm-Bonferroni method was used to correct for multiple comparisons for each post-hoc  
247 test; corrected *p*-values are denoted as *p*<sub>HB</sub>.

248 Finally, we created FC fingerprint plots to elucidate between-group differences. For each  
249 set of targets, connectivity values were mean-centered across subjects in each sample by  
250 subtracting the mean FC across all targets from the mean FC of each individual target. Thus, the  
251 fingerprint plots indicate how the basolateral amygdala connects to the targets in each sample,  
252 accounting for average differences in connectivity.

## 253 **Results**

### 254 **Anatomically defined OTC**

255 A 2 (sample) x 5 (OTC section) ANOVA was conducted to assess how basolateral  
256 amygdala connectivity to the occipitotemporal cortex changes across development. There was a  
257 significant main effect of sample,  $F(1,390) = 22.42$ ,  $p = 3.08 \times 10^{-6}$ , and OTC section,  $F(4,390)$   
258  $= 20.97$ ,  $p = 1.13 \times 10^{-15}$ . More specifically, across samples, connectivity to each of the sections  
259 decreased on a gradient from anterior to posterior, with significantly more connectivity to OTC 5  
260 than OTC 4 ( $t(79) = -4.44$ ,  $p_{HB} = 1.45 \times 10^{-4}$ ), to OTC 4 than OTC 3 ( $t(79) = -2.55$ ,  $p_{HB} = 0.03$ ),  
261 to OTC 3 than OTC 2 ( $t(79) = -4.04$ ,  $p_{HB} = 5.01 \times 10^{-4}$ ), and to OTC 2 than OTC 1 ( $t(79) = -2.06$ ,  
262  $p_{HB} = 0.04$ ). See Table S1 for all OTC statistical comparisons.

263 Importantly, the sample x OTC interaction was also significant,  $F(4,390) = 13.22$ ,  $p =$   
264  $4.15 \times 10^{-10}$ . To probe this interaction post hoc, a one-way ANOVA was conducted separately for  
265 each sample across the OTC sections (Fig 1B). Whereas the adult sample showed a significant  
266 main effect of OTC section ( $F(4,195) = 28.76$ ,  $p = 8.63 \times 10^{-19}$ ), the neonate sample did not

## BASOLATERAL AMYGDALA CONNECTIVITY

267  $F(4,195) = 2.05, p = 0.09$ ). Adults showed decreasing connectivity on a gradient from OTC 5 to  
268 OTC 4 ( $t(39) = -2.91, p_{\text{HB}} = 0.01$ ), OTC 4 to OTC 3 ( $t(39) = -1.99, p_{\text{HB}} = 0.05$ ), OTC 3 to OTC 2  
269 ( $t(39) = -6.06, p_{\text{HB}} = 2.60 \times 10^{-6}$ ), and OTC 2 to OTC 1 ( $t(39) = -3.53, p_{\text{HB}} = 3.20 \times 10^{-3}$ ).  
270 Although a main effect of OTC section was not observed in neonates, planned t-tests were run to  
271 quantify a gradient: neonates showed differentiation between OTC 5 and OTC 4 ( $t(39) = -3.33,$   
272  $p_{\text{HB}} = 0.02$ ), but connectivity to the rest of the subsequent OTC sections was not significantly  
273 different. The differential patterns of connectivity between adults and neonates is additionally  
274 represented in an FC fingerprint plot (Fig 1C); the mean-centered connectivity within all five  
275 OTC sections significantly differed between adults and neonates. See Table S2 and Table S3 for  
276 all within- and between-sample OTC statistical comparisons, respectively.

277

278 **Fig 1. Anatomical Regions and Functional Connectivity Results.** (A) Basolateral (BaLa)  
279 amygdala and anatomical targets used for connectivity analyses. Left, an example parcellation of  
280 the basal and lateral amygdala subnuclei in a representative subject, using the atlas developed by  
281 Saygin et al., 2017. Right, depiction of the 5 occipitotemporal cortex (OTC) labels in a  
282 representative subject. Labels marked from most anterior (OTC 5, dark blue) to most posterior  
283 (OTC 1, dark green). (B) Bar plot of mean functional connectivity to each of the 5 OTC sections  
284 arranged from anterior to posterior for each sample, with adults in gray and neonates in red.  
285 Error bars are standard error of the mean. † $p < 0.06$ , \* $p < 0.05$ , \*\* $p < 0.01$ , \*\*\* $p < 0.001$  (C) FC  
286 fingerprint plot depicting the pattern of connectivity of both samples. Axes are mean centered FC  
287 values for each sample.

288

## 289 Functionally defined regions within OTC

### 290 Parcels

291 A 2 (sample) x 11 (functional parcel) ANOVA was conducted to assess how basolateral  
292 amygdala connectivity to functional parcels within the occipitotemporal cortex changes across

## BASOLATERAL AMYGDALA CONNECTIVITY

293 development. Again, there was a significant main effect of sample,  $F(1,858) = 19.43, p = 1.18 \times$   
294  $10^{-5}$ , and parcel,  $F(10,858) = 6.39, p = 1.57 \times 10^{-9}$ .

295 Additionally, the sample  $\times$  parcel interaction was also significant,  $F(10,858) = 10.43, p =$   
296  $9.21 \times 10^{-17}$ . To probe this interaction post hoc, a one-way ANOVA was conducted separately for  
297 each sample across the 11 parcels (Fig 2B). Again, whereas the adult sample showed a  
298 significant main effect of functional parcel ( $F(10,429) = 13.77, p = 4.04 \times 10^{-21}$ ), the neonate  
299 sample did not ( $F(10,429) = 0.78, p = 0.65$ ). Post-hoc t-tests were only conducted on adults (see  
300 Table S4 for all comparisons in adults); of particular note, adults showed significantly different  
301 connectivity between parcels within the same OTC section, such as A1 and STG within OTC 4  
302 ( $t(39) = -5.68, p_{HB} = 8.14 \times 10^{-5}$ ), and between OFA and V1 within OTC 1 ( $t(39) = 6.08, p_{HB} =$   
303  $2.35 \times 10^{-5}$ ), whereas neonates did not show an effect of functional parcel.

304

305 **Fig 2. Functional Parcels and Functional Connectivity Results.** (A) Basolateral (BaLa)  
306 amygdala and functional targets used for connectivity analyses. Left, BaLa parcellation in a  
307 representative subject. Right, depiction of the 11 functional parcels used as targets. (B) Bar plot  
308 of mean functional connectivity to each of the 11 parcels arranged from anterior to posterior for  
309 each sample, with adults in gray and neonates in red. X-axis color represents OTC section where  
310 majority of parcel is located, from blue (OTC 4, A1 and STG) to dark green (OTC 1, OFA and  
311 V1). Error bars are standard error of the mean. Significance depicted between regions within the  
312 same OTC section only. \* $p < 0.05$ , \*\* $p < 0.01$ , \*\*\* $p < 0.001$

313

### 314 Categories

315 To probe whether the connectivity differences across the parcels could better be  
316 attributed to overall function rather than anatomical location, a 2 (sample)  $\times$  7 (functional  
317 category) ANOVA was conducted to assess how basolateral amygdala connectivity to functional  
318 categories changes across development. As before, there was a significant main effect of sample,  
319  $F(1,546) = 7.19, p = 0.01$ , and category,  $F(6,546) = 9.02, p = 2.08 \times 10^{-9}$ .

## BASOLATERAL AMYGDALA CONNECTIVITY

320            Additionally, the sample x category interaction was also significant,  $F(6,546) = 14.97$ ,  $p$   
321            =  $6.96 \times 10^{-16}$ . To probe this interaction post hoc, a one-way ANOVA was conducted separately  
322            for each sample across the 7 categories (Fig 3A). Again, whereas the adult sample showed a  
323            significant main effect of functional category ( $F(6,273) = 20.42$ ,  $p = 9.90 \times 10^{-20}$ ), the neonate  
324            sample did not  $F(6,273) = 0.62$ ,  $p = 0.71$ ). As depicted in Fig 3A, adults showed more  
325            connectivity to parcels that functionally process faces, bodies, objects, and high-level auditory  
326            processing, and less connectivity to parcels that functionally process scenes and primary auditory  
327            and visual cortex. Neonates showed undifferentiated connectivity across categories. As indicated  
328            in the FC fingerprint plot (Fig 3B), all seven functional categories exhibited significant between-  
329            group differences in mean-centered connectivity patterns. See Table S5 and Table S6 for all  
330            statistical comparisons within adults and between samples, respectively.

331  
332            **Fig 3. Functional Connectivity to Functional Categories.** (A) Bar plot of mean functional  
333            connectivity to each of the 7 functional categories, with adults in gray and neonates in red. Error  
334            bars are standard error of the mean. \* $p < 0.05$ , \*\* $p < 0.01$ , \*\*\* $p < 0.001$  (C) FC fingerprint plot  
335            depicting the pattern of connectivity of both samples. Axes are mean centered FC values for each  
336            sample. Parentheses show which of the 11 parcels were included in each category. Asterisks  
337            denote significance between groups for each category.

338

## 339 Discussion

340            Investigating the functional connectivity between the amygdala and occipitotemporal  
341            cortex will help us better understand the amygdala's role in perceiving and processing emotional  
342            visual stimuli, which has ecological relevance and certainly changes across development. Many  
343            functionally specialized visual regions exist within occipitotemporal cortex, but it was previously  
344            unknown how connectivity to these regions develops from birth in humans. Previous work in

## BASOLATERAL AMYGDALA CONNECTIVITY

345 macaques had revealed connections between the lateral and basal amygdala subnuclei and the  
346 occipitotemporal cortex, noting a rostrocaudal topographic organization of the connections (e.g.,  
347 (22)) and refinement across development (e.g., (23)). In this paper, we explored this topographic  
348 organization in humans using functional connectivity, and further investigated specific functional  
349 cortical areas located within the occipitotemporal region that may contribute to the observed  
350 pattern of connectivity.

351         In our study, connectivity between the basolateral amygdala and occipitotemporal cortex  
352 in human adults decreased on a gradient from anterior to posterior, replicating the finding in  
353 macaques. However, the connectivity in neonates was largely undifferentiated, suggesting that  
354 the topographic organization in adulthood is not yet present at birth. Splitting the cortex into  
355 functionally defined parcels allowed us to further hone in on the developmental changes in this  
356 pattern. If the gradient of connectivity was reliant on anatomical location (e.g., cortex closer to  
357 the amygdala is more functionally connected), then splitting the cortex into parcels should have  
358 revealed a comparable gradient. Instead, the parcels had varied connectivity with the amygdala  
359 in adults, even when anatomically located in the same OTC section. For instance, within more  
360 anterior regions of the OTC, connectivity was driven more by connections with STG (known for  
361 processing high-level auditory information, e.g., speech) than with adjacent A1 (primary  
362 auditory cortex). Similarly, in posterior OTC, lower connectivity in adults was driven more by  
363 connections with V1 (primary visual cortex) than by connections with OFA (known for  
364 processing faces). This would suggest that functional processing of the cortex contributes to the  
365 development of connectivity between the amygdala and OTC: adults showed more connectivity  
366 to high-level sensory regions (i.e., regions processing faces, bodies, objects, high-level audition)  
367 relative to primary sensory regions (i.e., V1, A1). Conversely, neonates had similar connectivity



## BASOLATERAL AMYGDALA CONNECTIVITY

368 to all functional parcels and categories, with not much differentiation among them. Interestingly,  
369 V1 showed the largest developmental difference between the two samples, with positive  
370 connectivity in neonates and negative connectivity in adults. These results are in line with studies  
371 in macaques (e.g., (23,24)) where both adult and infant macaques showed comparably high  
372 amygdalar connectivity with anterior temporal cortex, but only infants showed additional  
373 connections to posterior OTC regions. Human neonates and adults in the present study also  
374 showed relatively high connectivity to anterior OTC, but only neonates showed high  
375 connectivity with posterior OTC.

376         The present study also revealed noticeable differences in amygdalar connectivity to each  
377 of the distinct functional categories in adults, where basolateral connectivity was highest with  
378 face, body, and high-level auditory regions. This pattern of differential connection strength was  
379 largely absent in neonates, who showed similar strength of connection to almost all of the  
380 functional regions. Previous work in infants found similarities in amygdalar functional circuitry  
381 in infants as in adults (37), as well as similar (but still immature) functional organization of  
382 visual cortex in infants as in adults (56). Although informative, these particular studies used  
383 samples of infants between the ages of 2.3-8.6 months; the present study examines neonates with  
384 gestational age between 37-44 weeks. Given that the neonates showed largely undifferentiated  
385 connectivity of the basolateral amygdala with various functional regions compared to adults, but  
386 functional organization appears more adult-like after a few months in other studies, we posit that  
387 adult-like connectivity between the basolateral amygdala and functional regions of the OTC are  
388 not present at birth and instead require at least some experience (i.e., a few months) to develop.  
389 This is in line with previous work suggesting that refinement and pruning of connections  
390 typically occur after relevant cognitive milestones and neural specialization occur (57–59).

## BASOLATERAL AMYGDALA CONNECTIVITY

391 Experience with the environment postnatally may lead to notable age-related changes, and  
392 activity-dependent interactions between cortical regions may fine-tune their functionality. The  
393 functional maturation of the occipitotemporal regions that were studied here may contribute to  
394 the continued refinement of the amygdalar subregions, the amygdalar connections to these  
395 regions, and to the functional specialization of occipitotemporal regions themselves (e.g. in line  
396 with Interactive Specialization theories of development; (60)).

397         One notable limitation of the present study is that we use functional parcels originally  
398 defined in adults, and recognize that overlaying them onto neonates may have the potential to  
399 overestimate or mischaracterize certain cortex. However, we used ANTs to register the  
400 functional parcels to each neonate's native space, which has been shown to be highly effective  
401 and reliable (61). These limitations can only be overcome by functionally defining regions of  
402 interest in each individual, which may not be reliable in a sample of newborns (see (62) for a  
403 review of neuroimaging methods in adults vs. neonates), or perhaps with longitudinal studies that  
404 can functionally localize regions using task-based fMRI at a later age and register them to the  
405 same individual's connectivity scan at an earlier age (e.g., (63)).

406         Overall, the present experiments make apparent a decreasing pattern of connectivity  
407 between the amygdala and posterior aspects of occipitotemporal cortex, evidence for which has  
408 been repeatedly shown in macaques but was otherwise lacking in humans. Further, we contrast  
409 adult data with a sample of neonates scanned within one week of birth, to gauge what  
410 connectivity exists primitively, prior to extensive experience with the world. Additionally, we  
411 identify putative functional areas in the ventral visual stream that might be driving the observed  
412 pattern of connectivity changes. This work has important clinical applications: Given the role of  
413 the amygdala in many psychiatric disorders – many of which have early onsets, such as autism

## BASOLATERAL AMYGDALA CONNECTIVITY

414 and anxiety (e.g., (35,64–67)) – it is crucial to fully understand how the amygdala connects to the  
415 rest of the brain across early development. The developmental progression of connectivity  
416 between the amygdala and occipitotemporal cortex in typically-developing humans can help us  
417 better understand developmental disorders or deficits implicated when these connections are  
418 abnormal or lacking. Further research can seek to explore this connectivity in patient  
419 populations, classify differences between patients and controls, and offer new diagnostic or  
420 treatment interventions.

421  
422

## 423 **Acknowledgements**

424 Analyses were completed using the Ohio Supercomputer Cluster (<https://www.osc.edu>). We  
425 would like to thank the Human Connectome Project (<https://www.humanconnectome.org>) and  
426 developing Human Connectome Project (<http://www.developingconnectome.org>), David Osher  
427 for comments and suggestions, and members of Z-Lab (Saygin Developmental Cognitive  
428 Neuroscience Lab) for feedback and comments.

429

## BASOLATERAL AMYGDALA CONNECTIVITY

### 430 **References**

- 431 1. Phelps EA, Ling S, Carrasco M. Emotion facilitates perception and potentiates the  
432 perceptual benefits of attention. *Psychol Sci.* 2006;17(4):292–9.
- 433 2. Kosslyn SM, Shin LM, Thompson WL, McNally RJ, Rauch SL, Pitman RK, et al. Neural  
434 effects of visualizing and perceiving aversive stimuli (PET). *Neuroreport.*  
435 1996;7(10):1569–76.
- 436 3. Teller DY, McDonald M, Preston K, Sebris SL, Dobson V. Assessment of visual acuity in  
437 infants and children: The acuity card procedure. *Dev Med Child Neurol.* 1986;28:779–89.
- 438 4. Leppänen JM, Nelson CA. Tuning the developing brain to social signals of emotions. *Nat*  
439 *Rev Neurosci.* 2009;10(1):37–47.
- 440 5. Ochsner KN, Silvers JA, Buhle JT. Functional imaging studies of emotion regulation: a  
441 synthetic review and evolving model of the cognitive control of emotion. *Ann N Y Acad*  
442 *Sci.* 2012;1251:1–24.
- 443 6. Phillips ML, Drevets WC, Rauch SL, Lane R. Neurobiology of Emotion Perception I: The  
444 Neural Basis of Normal Emotion Perception. *Biol Psychiatry.* 2003;54:504–14.
- 445 7. Adolphs R, Spezio M. Role of the amygdala in processing visual social stimuli. *Prog*  
446 *Brain Res.* 2006;156:363–78.
- 447 8. Adolphs R, Gosselin F, Buchanan TW, Tranel D, Schyns P, Damasio AR. A mechanism  
448 for impaired fear recognition after amygdala damage. *Lett to Nat.* 2005;433:68–72.
- 449 9. Phillips RG, Ledoux JE. Differential Contribution of Amygdala and Hippocampus to  
450 Cued and Contextual Fear Conditioning. *Behav Neurosci.* 1992;106(2):274–85.
- 451 10. Baxter MG, Murray EA. The amygdala and reward. *Nat Rev Neurosci.* 2002;3:563–73.
- 452 11. Paton JJ, Belova MA, Morrison SE, Salzman CD. The primate amygdala represents the

## BASOLATERAL AMYGDALA CONNECTIVITY

- 453 positive and negative value of visual stimuli during learning. *Nature*.  
454 2006;439(February):865–70.
- 455 12. Kiehl KA, Stevens MC, Laurens KR, Pearlson G, Calhoun VD, Liddle PF. An adaptive  
456 reflexive processing model of neurocognitive function: supporting evidence from a large  
457 scale (n = 100) fMRI study of an auditory oddball task. *Neuroimage*. 2005;25:899–915.
- 458 13. Schwartz CE, Wright CI, Shin LM, Kagan J, Whalen PJ, McMullin KG, et al. Differential  
459 Amygdalar Response to Novel versus Newly Familiar Neutral Faces: A Functional MRI  
460 Probe Developed for Studying Inhibited Temperament. *Biol Psychiatry*.  
461 2003;3223(53):854–62.
- 462 14. Tottenham N, Hare TA, Casey BJ. A developmental perspective on human amygdala  
463 function. In: *The human amygdala*. New York, NY, US: The Guilford Press; 2009. p.  
464 107–17.
- 465 15. Atkinson J. *The Developing Visual Brain* [Internet]. Oxford Psychology Series. Oxford:  
466 Oxford University Press; 2002. 200 p. Available from:  
467 [https://www.oxfordscholarship.com/10.1093/acprof:oso/9780198525998.001.0001/acprof](https://www.oxfordscholarship.com/10.1093/acprof:oso/9780198525998.001.0001/acprof-9780198525998)  
468 [-9780198525998](https://www.oxfordscholarship.com/10.1093/acprof:oso/9780198525998.001.0001/acprof-9780198525998)
- 469 16. Goodale MA, Milner AD. Separate visual pathways for perception and action. *Trends*  
470 *Neurosci*. 1992;15(1):20–5.
- 471 17. Vuilleumier P. How brains beware: neural mechanisms of emotional attention. *Trends*  
472 *Cogn Sci*. 2005;9(12):585–94.
- 473 18. Iwai E, Yuki M, Suyama H, Shirakawa S. Amygdalar connections with middle and  
474 inferior temporal gyri of the monkey. *Neurosci Lett*. 1987;83(1–2):25–9.
- 475 19. Amaral DG, Price JL. Amygdalo-cortical projections in the monkey (*Macaca fascicularis*).

## BASOLATERAL AMYGDALA CONNECTIVITY

- 476 J Comp Neurol [Internet]. 1984 Dec 20;230(4):465–96. Available from:  
477 <https://doi.org/10.1002/cne.902300402>
- 478 20. Amaral DG. The Primate Amygdala and the Neurobiology of Social Behavior:  
479 Implications for Understanding Social Anxiety. *Biol Psychiatry*. 2002;51:11–7.
- 480 21. Amaral DG, Behniea H, Kelly JL. Topographic organization of projections from the  
481 amygdala to the visual cortex in the macaque monkey. *Neuroscience*. 2003;118(4):1099–  
482 120.
- 483 22. Freese JL, Amaral DG. Synaptic organization of projections from the amygdala to visual  
484 cortical areas TE and V1 in the macaque monkey. *J Comp Neurol*. 2005;496(5):655–67.
- 485 23. Webster MJ, Ungerleider LG, Bachevalier J. Connections of Inferior Temporal Areas TE  
486 and TEO with Medial Temporal-Lobe Structures in Infant and Adult Monkeys. *J*  
487 *Neurosci*. 1991;11(4):1095–116.
- 488 24. Webster MJ, Ungerleider LG, Bachevalier J. Lesions of inferior temporal area TE in  
489 infant monkeys alter cortico-amygdalar projections. *Neuroreport*. 1991;2:769–72.
- 490 25. Kalin NH, Shelton SE, Davidson RJ, Kelley AE. The Primate Amygdala Mediates Acute  
491 Fear But Not the Behavioral and Physiological Components of Anxious Temperament. *J*  
492 *Neurosci*. 2001;21(6):2067–74.
- 493 26. Kalin NH, Shelton SE, Takahashi LK. Defensive Behaviors in Infant Rhesus Monkeys :  
494 Ontogeny and Context-Dependent Selective Expression. *Child Dev*. 1991;62(5):1175–83.
- 495 27. Bouwmeester H, Smits K, Ree JM Van. Neonatal Development of Projections to the  
496 Basolateral Amygdala From Prefrontal and Thalamic Structures in Rat. *J Comp Neurol*.  
497 2002;450:241–55.
- 498 28. Bouwmeester H, Wolterink G, Ree JMVR. Neonatal Development of Projections From

## BASOLATERAL AMYGDALA CONNECTIVITY

- 499 the Basolateral Amygdala to Prefrontal , Striatal , and Thalamic. *J Comp Neurol*.  
500 2002;442:239–49.
- 501 29. Passingham R. How good is the macaque monkey model of the human brain? *Curr Opin*  
502 *Neurobiol*. 2009;19(1):6–11.
- 503 30. Van Essen DC, Donahue C, Dierker DL, Glasser MF. Parcellations and Connectivity  
504 Patterns in Human and Macaque Cerebral Cortex. 2016. 89–106 p.
- 505 31. Saygin ZM, Osher DE, Augustinack J, Fischl B, Gabrieli JDE. Connectivity-based  
506 segmentation of human amygdala nuclei using probabilistic tractography. *Neuroimage*  
507 [Internet]. 2011;56(3):1353–61. Available from:  
508 <http://dx.doi.org/10.1016/j.neuroimage.2011.03.006>
- 509 32. Bach DR, Behrens TE, Garrido L, Weiskopf N, Dolan RJ. Deep and Superficial  
510 Amygdala Nuclei Projections Revealed In Vivo by Probabilistic Tractography. *J Neurosci*  
511 [Internet]. 2011;31(2):618–23. Available from:  
512 <http://www.jneurosci.org/cgi/doi/10.1523/JNEUROSCI.2744-10.2011>
- 513 33. Brown VM, Labar KS, Haswell CC, Gold AL, Beall SK, Van Voorhees E, et al. Altered  
514 resting-state functional connectivity of basolateral and centromedial amygdala complexes  
515 in posttraumatic stress disorder. *Neuropsychopharmacology* [Internet]. 2014;39(2):351–9.  
516 Available from: <http://dx.doi.org/10.1038/npp.2013.197>
- 517 34. Qin S, Young CB, Supekar K, Uddin LQ, Menon V. Immature integration and segregation  
518 of emotion-related brain circuitry in young children. *Proc Natl Acad Sci*.  
519 2012;109(20):7941–6.
- 520 35. Qin S, Young CB, Duan X, Chen T, Supekar K, Menon V. Amygdala subregional  
521 structure and intrinsic functional connectivity predicts individual differences in anxiety

## BASOLATERAL AMYGDALA CONNECTIVITY

- 522 during early childhood. *Biol Psychiatry* [Internet]. 2014;75(11):892–900. Available from:  
523 <http://dx.doi.org/10.1016/j.biopsych.2013.10.006>
- 524 36. Gabard-Durnam LJ, Flannery J, Goff B, Gee DG, Humphreys KL, Telzer E, et al. The  
525 development of human amygdala functional connectivity at rest from 4 to 23 years : A  
526 cross-sectional study. *Neuroimage* [Internet]. 2014;95:193–207. Available from:  
527 <http://dx.doi.org/10.1016/j.neuroimage.2014.03.038>
- 528 37. Gabard-Durnam LJ, O’Muircheartaigh J, Dirks H, Dean DC, Tottenham N, Deoni S.  
529 Human amygdala functional network development: A cross-sectional study from 3 months  
530 to 5 years of age. *Dev Cogn Neurosci* [Internet]. 2018;34(June):63–74. Available from:  
531 <https://doi.org/10.1016/j.dcn.2018.06.004>
- 532 38. Saygin ZM, Kliemann D, Iglesias JE, van der Kouwe AJW, Boyd E, Reuter M, et al.  
533 High-resolution magnetic resonance imaging reveals nuclei of the human amygdala:  
534 manual segmentation to automatic atlas. *Neuroimage* [Internet]. 2017;155(May):370–82.  
535 Available from: <http://dx.doi.org/10.1016/j.neuroimage.2017.04.046>
- 536 39. Saygin ZM, Osher DE, Koldewyn K, Martin RE, Finn A, Saxe R, et al. Structural  
537 connectivity of the developing human amygdala. *PLoS One*. 2015;10(4):1–19.
- 538 40. Makropoulos A, Robinson EC, Schuh A, Wright R, Fitzgibbon S, Bozek J, et al. The  
539 developing human connectome project: A minimal processing pipeline for neonatal  
540 cortical surface reconstruction. *Neuroimage* [Internet]. 2018;173:88–112. Available from:  
541 <https://doi.org/10.1016/j.neuroimage.2018.01.054>
- 542 41. Van Essen DC, Smith SM, Barch DM, Behrens TEJ, Yacoub E, Ugurbil K. The WU-  
543 Minn Human Connectome Project: An overview. *Neuroimage* [Internet]. 2013;80:62–79.  
544 Available from: <http://www.sciencedirect.com/science/article/pii/S1053811913005351>



## BASOLATERAL AMYGDALA CONNECTIVITY

- 545 42. Hughes EJ, Winchman T, Padormo F, Teixeira R, Wurie J, Sharma M, et al. A Dedicated  
546 Neonatal Brain Imaging System. *Magn Reson Med*. 2017;78:794–804.
- 547 43. de Macedo Rodrigues K, Ben-Avi E, Sliva DD, Choe M, Drottar M, Wang R, et al. A  
548 FreeSurfer-compliant consistent manual segmentation of infant brains spanning the 0 – 2  
549 year age range. *Front Hum Neurosci*. 2015;9(February):1–12.
- 550 44. Zollei L, Ou Y, Iglesias J, Grant EP, Fischl B. FreeSurfer image processing pipeline for  
551 infant clinical MRI images. In: *Proceedings of the Organization for Human Brain  
552 Mapping Conference*. 2017.
- 553 45. Makropoulos A, Gousias IS, Ledig C, Aljabar P, Serag A, Hajnal J V, et al. Automatic  
554 Whole Brain MRI Segmentation of the Developing Neonatal Brain. *IEEE Trans Med  
555 Imaging*. 2014;33(9):1818–31.
- 556 46. Fitzgibbon SP, Harrison SJ, Jenkinson M, Baxter L, Robinson EC, Bastiani M, et al. The  
557 developing Human Connectome Project (dHCP) automated resting-state functional  
558 processing framework for newborn infants. *bioRxiv [Internet]*. 2019 Jan 1;766030.  
559 Available from: <http://biorxiv.org/content/early/2019/09/12/766030.abstract>
- 560 47. Salimi-Khorshidi G, Douaud G, Beckmann CF, Glasser MF, Griffanti L, Smith SM.  
561 Automatic denoising of functional MRI data: Combining independent component analysis  
562 and hierarchical fusion of classifiers. *Neuroimage [Internet]*. 2014;90:449–68. Available  
563 from: <http://www.sciencedirect.com/science/article/pii/S1053811913011956>
- 564 48. Glasser MF, Sotiropoulos SN, Wilson JA, Coalson TS, Fischl B, Andersson JL, et al. The  
565 minimal preprocessing pipelines for the Human Connectome Project. *Neuroimage  
566 [Internet]*. 2013;80:105–24. Available from:  
567 <http://www.sciencedirect.com/science/article/pii/S1053811913005053>

## BASOLATERAL AMYGDALA CONNECTIVITY

- 568 49. Johansen JP, Hamanaka H, Monfils MH, Behnia R, Deisseroth K, Blair HT, et al. Optical  
569 activation of lateral amygdala pyramidal cells instructs associative fear learning. *Proc Natl*  
570 *Acad Sci [Internet]*. 2010;107(28):12692–7. Available from:  
571 <http://www.pnas.org/lookup/doi/10.1073/pnas.1002418107>
- 572 50. Stefanacci L, Amaral DG. Some Observations on Cortical Inputs to the Macaque Monkey  
573 Amygdala: An Anterograde Tracing Study. *J Comp Neurol*. 2002;451(May):301–23.
- 574 51. Fedorenko E, Hsieh P-J, Nieto-Castañón A, Whitfield-Gabrieli S, Kanwisher N. New  
575 Method for fMRI Investigations of Language: Defining ROIs Functionally in Individual  
576 Subjects. *J Neurophysiol [Internet]*. 2010 Apr 21;104(2):1177–94. Available from:  
577 <https://doi.org/10.1152/jn.00032.2010>
- 578 52. Julian JB, Fedorenko E, Webster J, Kanwisher N. An algorithmic method for functionally  
579 defining regions of interest in the ventral visual pathway. *Neuroimage [Internet]*.  
580 2012;60(4):2357–64. Available from: <http://dx.doi.org/10.1016/j.neuroimage.2012.02.055>
- 581 53. Basilakos A, Smith KG, Fillmore P, Fridriksson J, Fedorenko E. Functional  
582 Characterization of the Human Speech Articulation Network. *Cereb Cortex [Internet]*.  
583 2018 Apr 27;28(5):1816–30. Available from: <https://doi.org/10.1093/cercor/bhx100>
- 584 54. Desikan RS, Ségonne F, Fischl B, Quinn BT, Dickerson BC, Blacker D, et al. An  
585 automated labeling system for subdividing the human cerebral cortex on MRI scans into  
586 gyral based regions of interest. *Neuroimage*. 2006;31(3):968–80.
- 587 55. Avants BB, Tustison NJ, Song G, Cook PA, Klein A, Gee JC. A reproducible evaluation  
588 of ANTs similarity metric performance in brain image registration. *Neuroimage [Internet]*.  
589 2011;54(3):2033–44. Available from: <http://dx.doi.org/10.1016/j.neuroimage.2010.09.025>
- 590 56. Deen B, Richardson H, Dilks DD, Takahashi A, Keil B, Wald LL, et al. Organization of

## BASOLATERAL AMYGDALA CONNECTIVITY

- 591 high-level visual cortex in human infants. *Nat Commun* [Internet]. 2017 Jan 10;8:13995.  
592 Available from: <http://dx.doi.org/10.1038/ncomms13995>
- 593 57. Gogtay N, Giedd JN, Lusk L, Hayashi KM, Greenstein D, Vaituzis AC, et al. Dynamic  
594 mapping of human cortical development during childhood through early adulthood. *Proc*  
595 *Natl Acad Sci*. 2004;101(21):8174–9.
- 596 58. O’Leary DDM. Development of connectional diversity and specificity in the mammalian  
597 brain by the pruning of collateral projections. *Curr Opin Neurobiol*. 1992;2:70–7.
- 598 59. Khundrakpam BS, Reid A, Brauer J, Carbonell F, Lewis J, Ameis S, et al. Developmental  
599 Changes in Organization of Structural Brain Networks. *Cereb Cortex*. 2013;23:2072–85.
- 600 60. Johnson MH. Interactive Specialization: A domain-general framework for human  
601 functional brain development? *Dev Cogn Neurosci*. 2010;1:7–21.
- 602 61. Tustison NJ, Cook PA, Klein A, Song G, Das SR, Duda JT, et al. Large-scale evaluation  
603 of ANTs and FreeSurfer cortical thickness measurements. *Neuroimage* [Internet].  
604 2014;99:166–79. Available from: <http://dx.doi.org/10.1016/j.neuroimage.2014.05.044>
- 605 62. Batalle D, Edwards AD, O’Muircheartaigh JO. Annual Research Review: Not just a small  
606 adult brain: understanding later neurodevelopment through imaging the neonatal brain. *J*  
607 *Child Psychol Psychiatry*. 2018;59(4):350–71.
- 608 63. Saygin ZM, Osher DE, Norton ES, Youssoufian DA, Beach SD, Feather J, et al.  
609 Connectivity precedes function in the development of the visual word form area. *Nat*  
610 *Neurosci*. 2016;19(9):1250–5.
- 611 64. Baron-Cohen S, Ring HA, Bullmore ET, Wheelwright S, Ashwin C, Williams SCR. The  
612 amygdala theory of autism. *Neurosci Biobehav Rev* [Internet]. 2000;24:355–64. Available  
613 from: [papers2://publication/uuid/DA1D308F-7F1E-4C34-A17C-A86DBE70D978](https://pubmed.ncbi.nlm.nih.gov/11111111/)

## BASOLATERAL AMYGDALA CONNECTIVITY

- 614 65. Pine DS. Research Review : A neuroscience framework for pediatric anxiety disorders. J  
615 Child Psychol Psychiatry. 2007;48(7):631–48.
- 616 66. Warnell KR, Pecukonis M, Redcay E. Developmental relations between amygdala volume  
617 and anxiety traits: Effects of informant, sex, and age. Dev Psychopathol. 2018;30:1503–  
618 15.
- 619 67. Lonigan CJ, Phillips BM. Temperamental influences on the development of anxiety  
620 disorders. In: The developmental psychopathology of anxiety. New York, NY, US:  
621 Oxford University Press; 2001. p. 60–91.

622

## 623 Supporting information

624 **S1 Fig. BaLa Overlap with dHCP DrawEm Amygdala Label in a representative neonate.**  
625 (left) Coronal and axial slices depicting the basolateral amygdala (yellow) as defined by  
626 automated segmentation (Saygin et al., 2017), overlaid on the whole amygdala as defined by  
627 dHCP’s DrawEm label (red). Overlap shown in orange (proportion overlap across all neonates:  
628  $0.76 \pm 0.11$ )

629

630 **S2 File. List of Anatomical Labels Combined to Create OTC.**

631

632 **S2 Fig. OTC label comparison in a representative individuals.** (left) neonate, (right) adult.  
633 Dark blue = OTC 5 (anterior), blue = OTC 4, light blue = OTC 3, lime green = OTC 2, dark  
634 green = OTC 1 (posterior).

635

636 **S1 Table. OTC Connectivity Differences Collapsed Across Samples.** t-test results and  
637 corresponding p-values comparing mean connectivity between each OTC section, collapsed  
638 across adults and neonates.

639

640 **S2 Table. OTC Connectivity Differences Within Each Sample.** t-test results and  
641 corresponding p-values comparing mean connectivity between each OTC section, separately for  
642 adults and neonates.

643

644 **S3 Table. OTC Connectivity Differences Between Samples.** t-test results and corresponding p-  
645 values comparing mean-centered connectivity between adults vs. neonates in each OTC section,  
646 from 5 (anterior) to 1 (posterior). See Fig 1C in main manuscript.

647

648 **S4 Table. Connectivity Differences Between Functional Parcels in Adults.** t-test results and

## BASOLATERAL AMYGDALA CONNECTIVITY

649 corresponding p-values comparing mean connectivity between each functional parcel in adults.

650

651 **S5 Table. Connectivity Differences Between Functional Categories in Adults.** t-test results  
652 and corresponding p-values comparing mean connectivity between each functional category in  
653 adults.

654

655 **S6 Table. Functional Category Connectivity Differences Between Samples.** t-test results and  
656 corresponding p-values comparing mean-centered connectivity between adults vs. neonates for  
657 each functional category. See Fig 3B in main manuscript.

658

A)

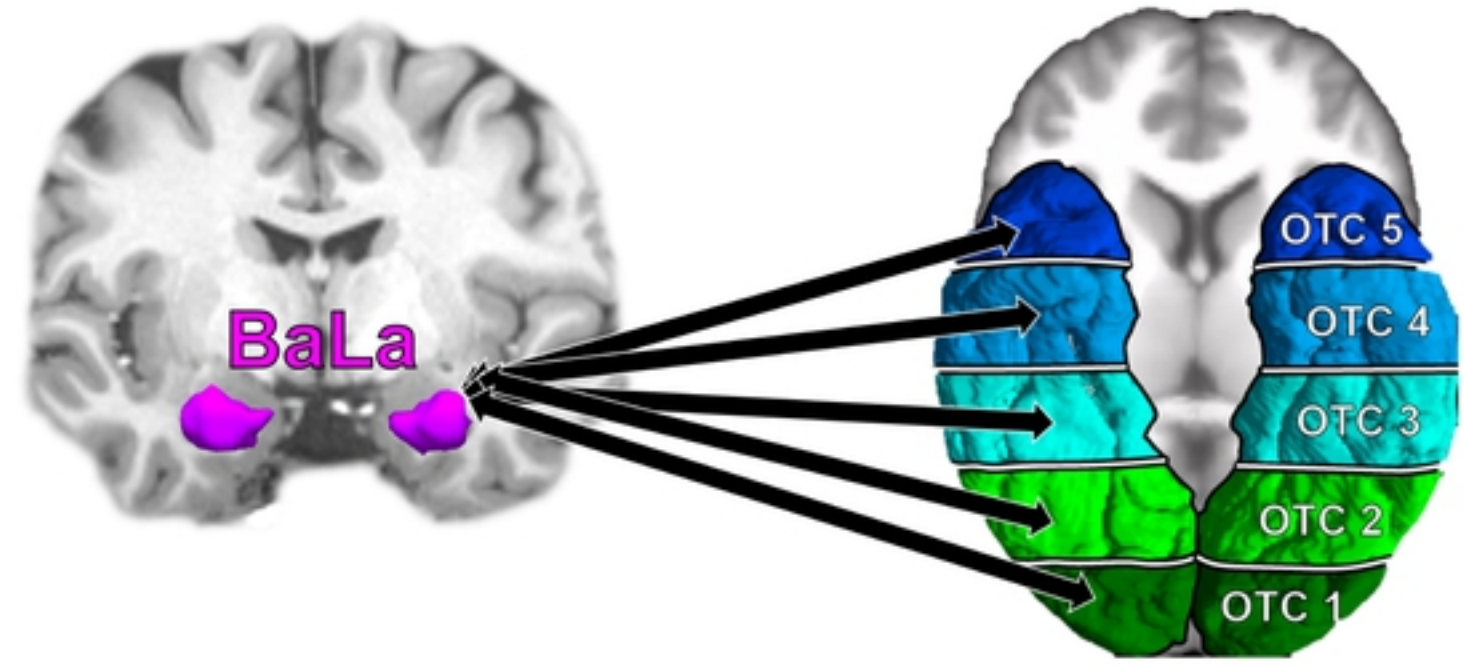

B)

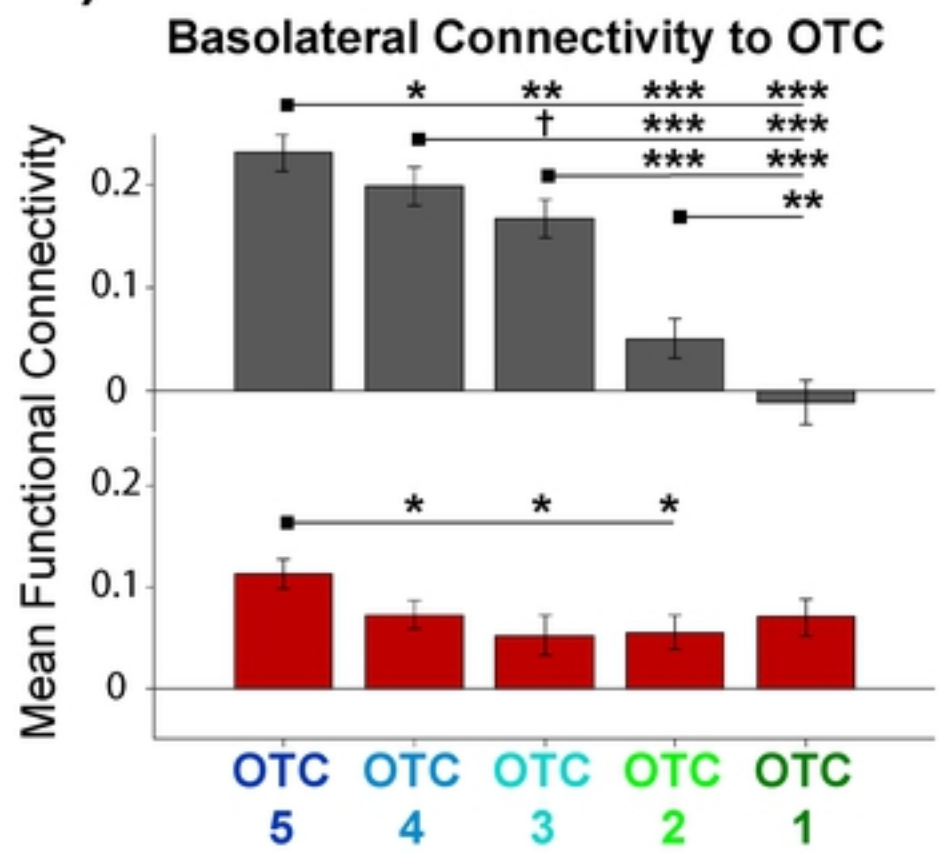

C)

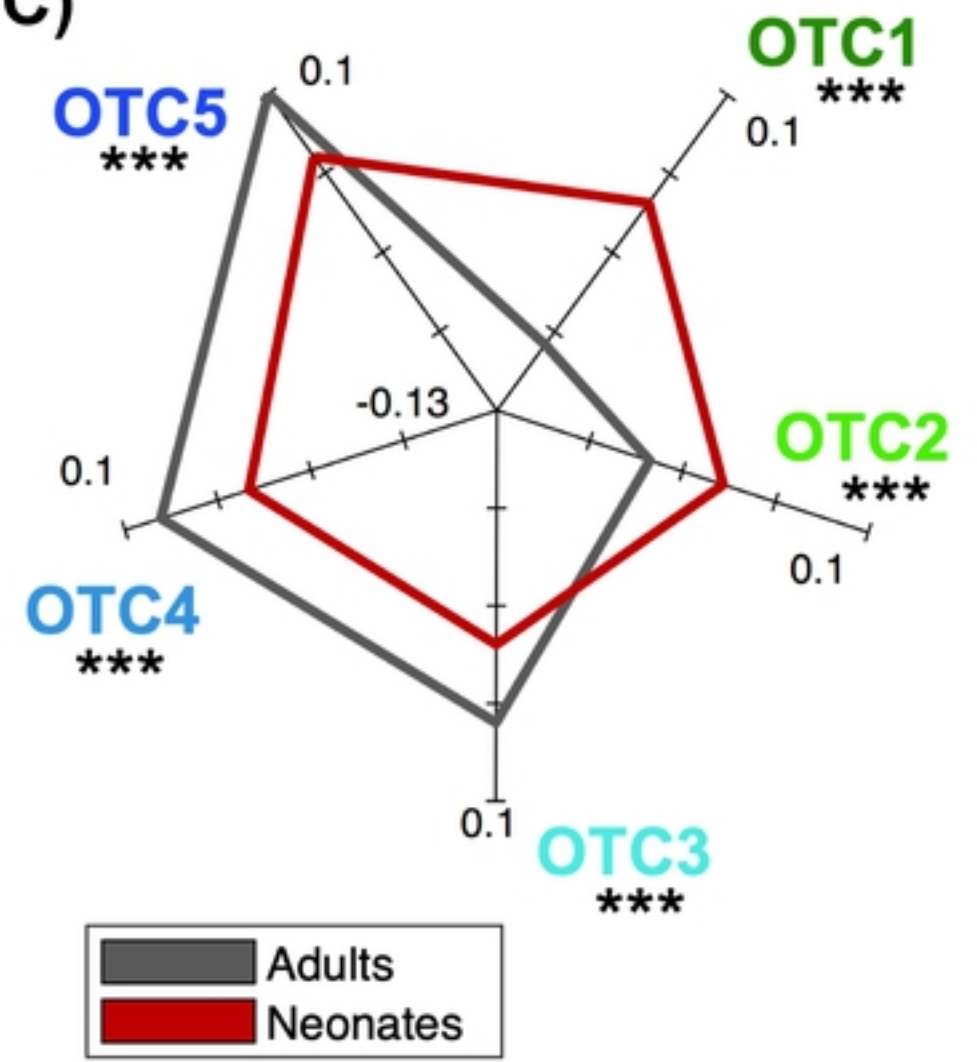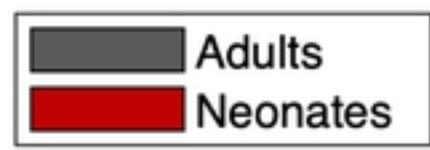

A)

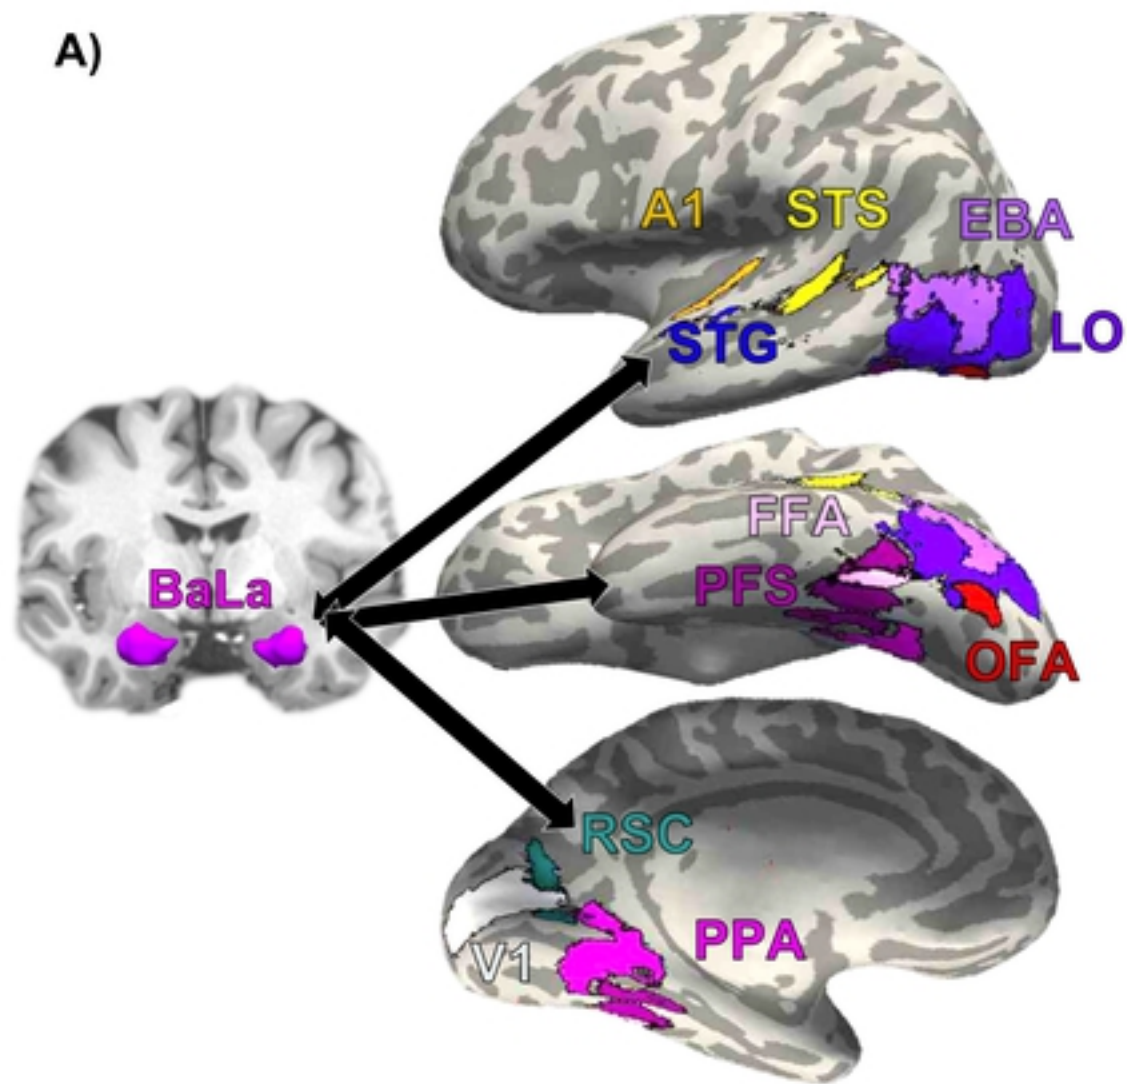

B)

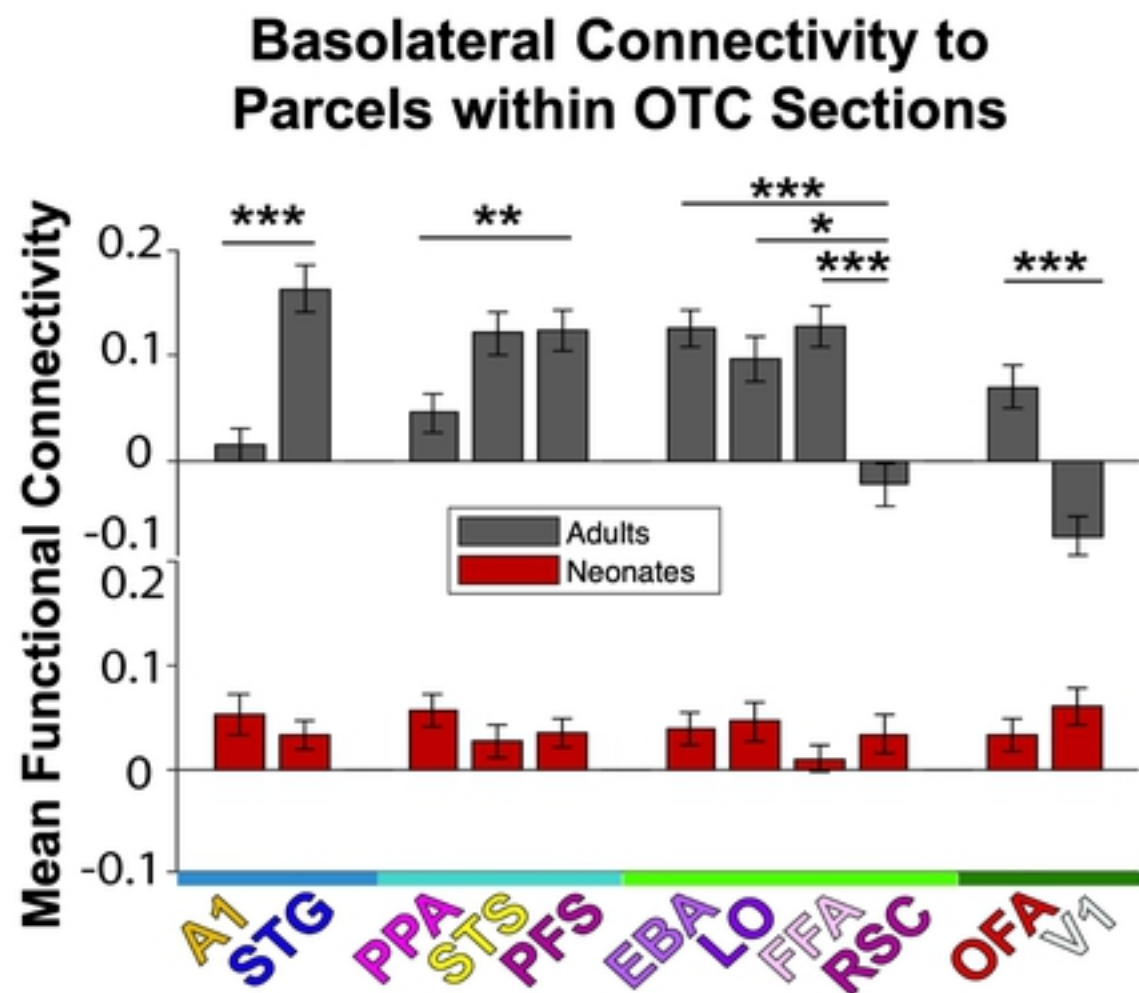

A)

## Basolateral Connectivity to Functional Categories

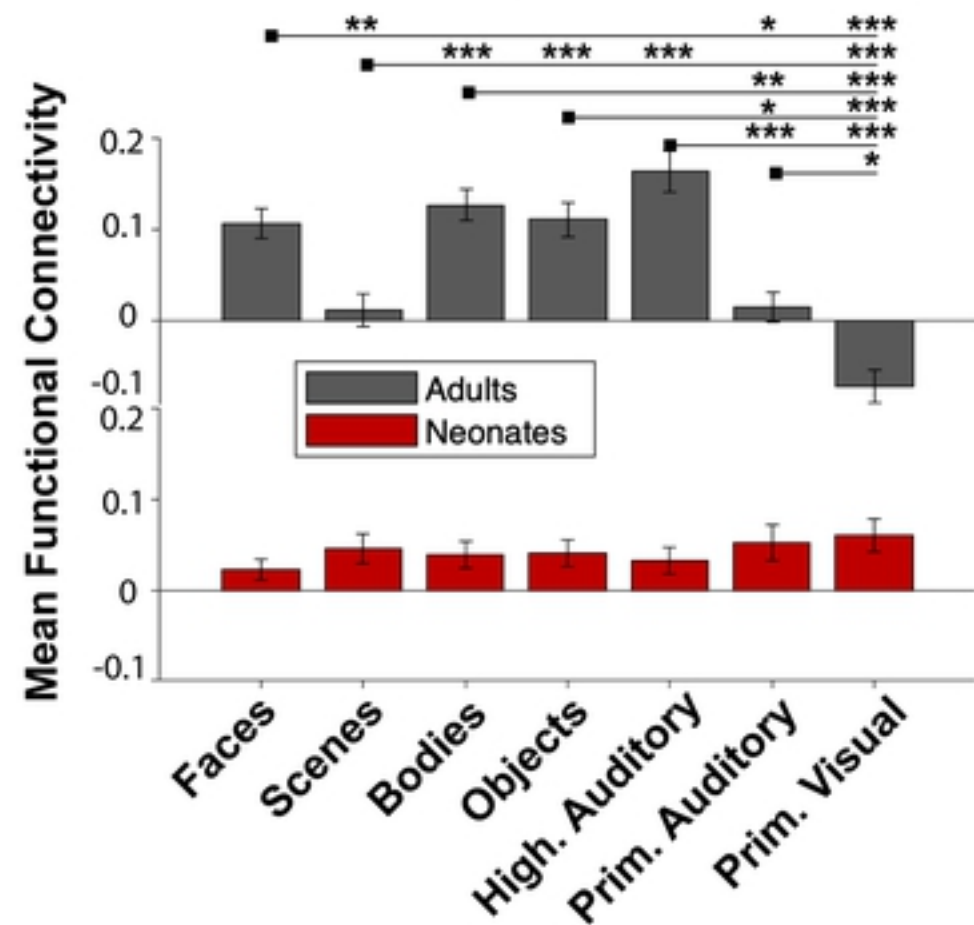

B)

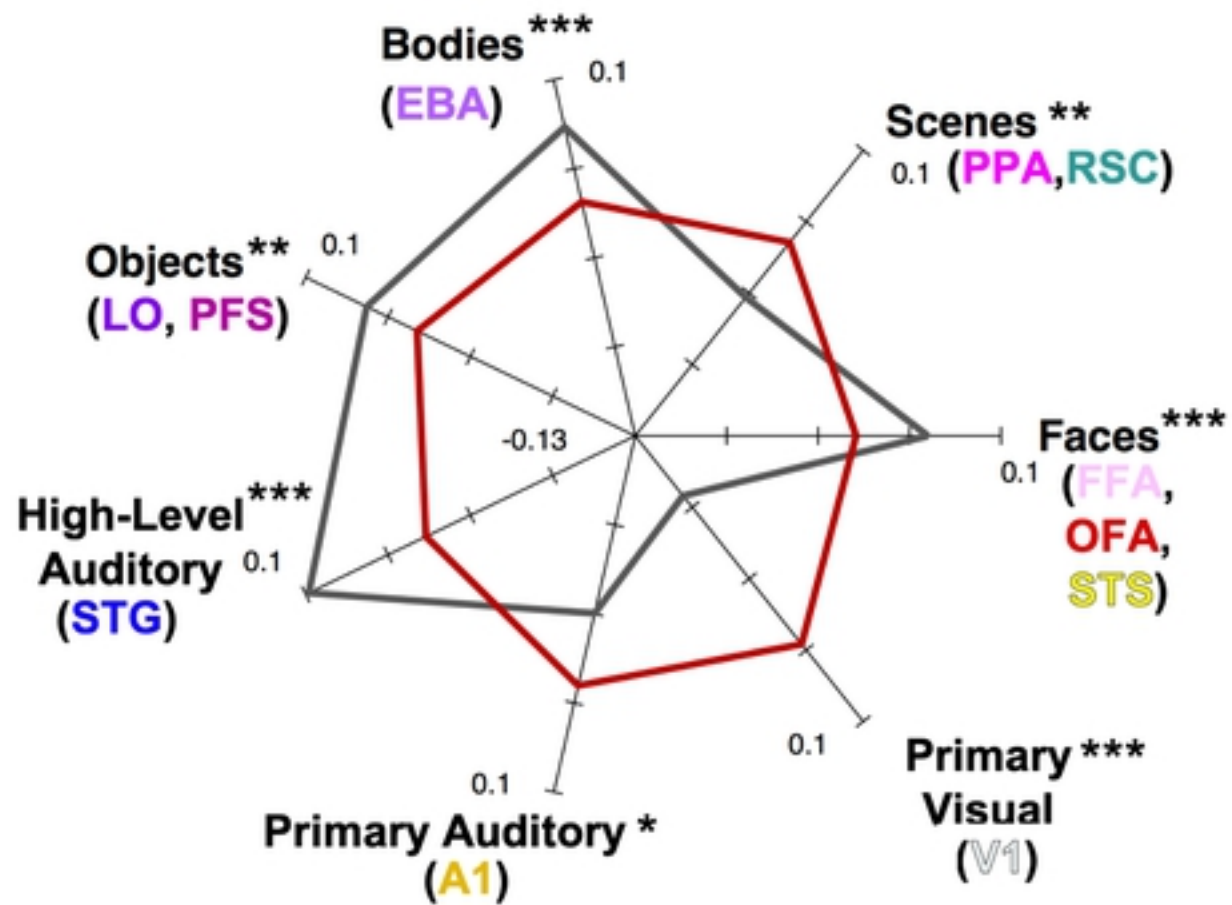

Source: https://www.biorxiv.org/content/10.1101/2020.07.23.217356v1.full.pdf
